# Supplementary material for: Opioid-induced respiratory depression increases hospital costs and length of stay in patients recovering on the general care floor
Source: PubMed Central journal article supplement (PMC7980593; doi:10.1186/s12871-021-01307-8), 2021-03-20
Supplement: 12871_2021_1307_MOESM1_ESM.pdf [file 12871_2021_1307_MOESM1_ESM.pdf]

**S1 Table. Multivariable Model Prediction of Respiratory Depression, PRODIGY Scoring System, and Utilization.** Adapted with permission from Wolters Kluwer Health, Inc: Khanna AK, Bergese SD, Jungquist CR, et al. Prediction of Opioid-Induced Respiratory Depression on Inpatient Wards Using Continuous Capnography and Oximetry: An International Prospective, Observational Trial. *Anesth Analg*; Publish Ahead of Print April 16, 2020. doi: 10.1213/ANE.0000000000004788. URL: [https://journals.lww.com/anesthesia-analgesia/Abstract/9000/Prediction\\_of\\_Opioid\\_Induced\\_Respiratory.95670.aspx](https://journals.lww.com/anesthesia-analgesia/Abstract/9000/Prediction_of_Opioid_Induced_Respiratory.95670.aspx)

| Clinical Characteristic                                                                                                        | Multivariable Model Predictors                   |                                                 |                     |         | Points If Clinical Characteristic = "Yes" |
|--------------------------------------------------------------------------------------------------------------------------------|--------------------------------------------------|-------------------------------------------------|---------------------|---------|-------------------------------------------|
|                                                                                                                                | Estimate                                         | Standard Error                                  | OR (95% CI)         | Pr >  t |                                           |
| Age (y)                                                                                                                        |                                                  |                                                 |                     |         |                                           |
| <60                                                                                                                            | Reference                                        | ...                                             | ...                 | ...     | 0                                         |
| ≥60 to <70                                                                                                                     | 0.8077                                           | 0.1458                                          | 2.243 (1.685–2.985) | <0.0001 | 8                                         |
| ≥70 to <80                                                                                                                     | 1.2323                                           | 0.1805                                          | 3.429 (2.407–4.886) | <0.0001 | 12                                        |
| ≥80                                                                                                                            | 1.5647                                           | 0.3657                                          | 4.781 (2.333–9.798) | <0.0001 | 16                                        |
| Sex (M)                                                                                                                        | 0.7550                                           | 0.1284                                          | 2.128 (1.654–2.737) | <0.0001 | 8                                         |
| Opioid naive                                                                                                                   | 0.2912                                           | 0.1652                                          | 1.338 (0.968–1.850) | 0.0782  | 3                                         |
| Sleep disorders                                                                                                                | 0.4755                                           | 0.1998                                          | 1.609 (1.087–2.381) | 0.0175  | 5                                         |
| Chronic heart failure                                                                                                          | 0.7494                                           | 0.4085                                          | 2.116 (0.949–4.715) | 0.0668  | 7                                         |
|                                                                                                                                |                                                  |                                                 |                     |         | "Sum = PRODIGY Score"                     |
|                                                                                                                                | PRODIGY Score Distribution                       |                                                 |                     |         |                                           |
|                                                                                                                                | Low Risk                                         | Intermediate Risk                               | High Risk           | P       |                                           |
| PRODIGY score                                                                                                                  | <8 points                                        | ≥8 and <15 points                               | ≥15 points          |         |                                           |
| % Pts with respiratory depression in risk category (n Pts in risk category with respiratory depression/n Pts in risk category) | 24% (83/351)                                     | 42% (192/457)                                   | 65% (299/458)       | <.0001  |                                           |
| Sensitivity (95% CI)                                                                                                           | ...                                              | 0.86 (0.82–0.88)                                | 0.52 (0.48–0.56)    |         |                                           |
| Specificity (95% CI)                                                                                                           | ...                                              | 0.39 (0.35–0.42)                                | 0.77 (0.74–0.80)    |         |                                           |
| PPV (95% CI)                                                                                                                   | ...                                              | 0.54 (0.50–0.57)                                | 0.65 (0.61–0.70)    |         |                                           |
| NPV (95% CI)                                                                                                                   | ...                                              | 0.76 (0.72–0.81)                                | 0.66 (0.63–0.69)    |         |                                           |
| OR (95% CI; P)                                                                                                                 | OR <sub>IL</sub> = 2.34<br>(1.72–3.19; P < .001) | OR <sub>HI</sub> = 2.6<br>(1.99–3.39; P < .001) |                     |         |                                           |
|                                                                                                                                | OR <sub>HL</sub> = 6.07<br>(4.44–8.30; P < .001) |                                                 |                     |         |                                           |

Abbreviations: CI, confidence interval; M, male; NPV, negative predictive value; OR, odds ratio; OR<sub>HI</sub>, odds ratio, high- versus intermediate-risk groups; OR<sub>HL</sub>, odds ratio, high- versus low-risk groups; OR<sub>IL</sub>, odds ratio, intermediate- versus low-risk groups; PPV, positive predictive value; PRODIGY, Prediction of Opioid-induced respiratory Depression In patients monitored by capnoGraphY; Pts, patients.
