# Supplementary material for: Opioid-induced respiratory depression increases hospital costs and length of stay in patients recovering on the general care floor
Source: PubMed Central journal article supplement (PMC7980593; doi:10.1186/s12871-021-01307-8), 2021-03-20
Supplement: 12871_2021_1307_MOESM3_ESM.pdf [file 12871_2021_1307_MOESM3_ESM.pdf]

**S3 Table. Demographic and clinical characteristics before and after propensity weighting of enrolled patients in the United States, excluding outliers.**

| Clinical Characteristic                   | Patient Characteristics before Propensity Weighting (excluding outliers) |                                           |         | Patient Characteristics after Propensity Weighting (excluding outliers) |                                                        |         |
|-------------------------------------------|--------------------------------------------------------------------------|-------------------------------------------|---------|-------------------------------------------------------------------------|--------------------------------------------------------|---------|
|                                           | No Respiratory Depression Episode (n=266)                                | ≥1 Respiratory Depression Episode (n=143) | p-value | No Respiratory Depression Episode (n=247) <sup>a</sup>                  | ≥1 Respiratory Depression Episode (n=123) <sup>a</sup> | p-value |
| <b>Age (yr) (Mean ± SD)</b>               | 52.6 ± 14.0                                                              | 62 ± 11.2                                 |         | 55.4 ± 13.8                                                             | 58.2 ± 11                                              |         |
| <60                                       | 67.3% (179/266)                                                          | 39.9% (57/143)                            | <.0001  | 58.4% (144/247)                                                         | 56.4% (69/123)                                         | .980    |
| ≥60 - <70                                 | 21.1% (56/266)                                                           | 33.6% (48/143)                            |         | 25.3% (63/247)                                                          | 26.2% (32/123)                                         |         |
| ≥70 - <80                                 | 9.8% (26/266)                                                            | 21.7% (31/143)                            |         | 13.6% (34/247)                                                          | 14% (17/123)                                           |         |
| ≥80                                       | 1.9% (5/266)                                                             | 4.9% (7/143)                              |         | 2.7% (7/247)                                                            | 3.3% (4/123)                                           |         |
| <b>Sex (Male)</b>                         | 30.5% (81/266)                                                           | 50.3% (72/143)                            | .0001   | 36.3% (90/247)                                                          | 43.3% (53/123)                                         | .193    |
| <b>BMI (kg/m<sup>2</sup>) (Mean ± SD)</b> | 32.4 ± 9.6                                                               | 30.2 ± 6.1                                |         |                                                                         |                                                        |         |
| <20                                       | 3.4% (9/266)                                                             | 2.1% (3/143)                              | .012    | 1.6% (4/247)                                                            | 1% (1/123)                                             | .806    |
| ≥20 - <25                                 | 17.3% (46/266)                                                           | 16.8% (24/143)                            |         | 18% (44/247)                                                            | 19.4% (24/123)                                         |         |
| ≥25 - <30                                 | 26.7% (71/266)                                                           | 35.7% (51/143)                            |         | 30.1% (74/247)                                                          | 27.5% (34/123)                                         |         |
| ≥30 - <35                                 | 19.5% (52/266)                                                           | 27.3% (39/143)                            |         | 21.7% (54/247)                                                          | 26.5% (33/123)                                         |         |
| ≥35                                       | 33.1% (88/266)                                                           | 18.2% (26/143)                            |         | 28.7% (71/247)                                                          | 25.6% (32/123)                                         |         |
| <b>Race/Ethnicity</b>                     |                                                                          |                                           |         |                                                                         |                                                        |         |
| American Indian or Alaska Native          | 0.4% (1/266)                                                             | 0% (0/143)                                | .0002   | 0.3% (1/247)                                                            | 0% (0/123)                                             | .931    |
| Asian                                     | 1.1% (3/266)                                                             | 0% (0/143)                                |         | 0.8% (2/247)                                                            | 0% (0/123)                                             |         |
| Black or African American                 | 30.1% (80/266)                                                           | 12.6% (18/143)                            |         | 23.9% (59/247)                                                          | 27.1% (33/123)                                         |         |
| Hispanic                                  | 0.8% (2/266)                                                             | 0.7% (1/143)                              |         | 0.5% (1/247)                                                            | 0% (0/123)                                             |         |
| White                                     | 0.8% (2/266)                                                             | 0.7% (1/143)                              |         | 0.8% (2/247)                                                            | 0.7% (1/123)                                           |         |
| Other                                     | 66.9% (178/266)                                                          | 86% (123/143)                             |         | 73.7% (182/247)                                                         | 72.2% (89/123)                                         |         |
| <b>Current Smoker</b>                     | 16.5% (44/266)                                                           | 15.4% (22/143)                            | .762    | 15.9% (39/247)                                                          | 17.6% (22/123)                                         | .672    |
| <b>Neck circumference</b>                 | 47.9% (127/265)                                                          | 40.8% (58/142)                            | .258    | 46.6% (115/247)                                                         | 44.5% (55/123)                                         | .708    |
| <b>ASA Physical Status</b>                |                                                                          |                                           |         |                                                                         |                                                        |         |
| ASA I                                     | 0.4% (1/256)                                                             | 0.7% (1/140)                              | .364    | 0.7% (2/247)                                                            | 0.8% (1/123)                                           | .952    |
| ASA II                                    | 42.2% (108/256)                                                          | 36.4% (51/140)                            |         | 40.5% (100/247)                                                         | 43% (53/123)                                           |         |
| ASA III                                   | 55.9% (143/256)                                                          | 59.3% (83/140)                            |         | 56.9% (141/247)                                                         | 54.2% (67/123)                                         |         |
| ASA IV                                    | 1.6% (4/256)                                                             | 3.6% (5/140)                              |         | 1.9% (5/247)                                                            | 2% (2/123)                                             |         |
| <b>Surgery Demographics</b>               |                                                                          |                                           |         |                                                                         |                                                        |         |
| Surgical Patient                          | 94.4% (251/266)                                                          | 96.5% (138/143)                           | .338    | 98% (242/247)                                                           | 96.9% (119/123)                                        | .478    |
| High Risk Surgery                         | 4.9% (13/266)                                                            | 7.7% (11/143)                             | .250    | 4.5% (11/247)                                                           | 4.7% (6/123)                                           | .951    |
| Open Surgery                              | 7.5% (20/266)                                                            | 13.3% (19/143)                            | .058    | 10.3% (26/247)                                                          | 10.1% (12/123)                                         | .934    |
| <b>Length of Surgery (hr)</b>             |                                                                          |                                           |         |                                                                         |                                                        |         |
| 0 hour                                    | 5.9% (16/272)                                                            | 4.1% (6/148)                              | .085    | 2% (5/247)                                                              | 3.1% (4/123)                                           | .914    |
| <2                                        | 36.4% (99/272)                                                           | 27% (40/148)                              |         | 34.7% (86/247)                                                          | 33.6% (41/123)                                         |         |
| ≥2 - <4                                   | 44.1% (120/272)                                                          | 48.6% (72/148)                            |         | 46.8% (116/247)                                                         | 46.8% (58/123)                                         |         |

| Clinical Characteristic                                | Patient Characteristics before Propensity Weighting (excluding outliers) |                                           |         | Patient Characteristics after Propensity Weighting (excluding outliers) |                                                        |         |
|--------------------------------------------------------|--------------------------------------------------------------------------|-------------------------------------------|---------|-------------------------------------------------------------------------|--------------------------------------------------------|---------|
|                                                        | No Respiratory Depression Episode (n=266)                                | ≥1 Respiratory Depression Episode (n=143) | p-value | No Respiratory Depression Episode (n=247) <sup>a</sup>                  | ≥1 Respiratory Depression Episode (n=123) <sup>a</sup> | p-value |
| ≥4                                                     | 13.6% (37/272)                                                           | 20.3% (30/148)                            |         | 16.5% (41/247)                                                          | 16.5% (20/123)                                         |         |
| <b>Opioid Demographics</b>                             |                                                                          |                                           |         |                                                                         |                                                        |         |
| Opioid Naive                                           | 68.8% (183/266)                                                          | 79.7% (114/143)                           | .018    | 73.4% (182/247)                                                         | 77.5% (95/123)                                         | .401    |
| Multiple Opioids or concurrent CNS/Sedating Medication | 98.9% (263/266)                                                          | 97.9% (140/143)                           | .426    | 100% (247/247)                                                          | 99.7% (123/123)                                        | 1       |
| One opioid                                             | 2.6% (7/266)                                                             | 2.8% (4/143)                              | .334    | 0.9% (2/247)                                                            | 0.7% (1/123)                                           | .780    |
| Opioid number >1 - <4                                  | 49.2% (131/266)                                                          | 56.6% (81/143)                            |         | 52.2% (129/247)                                                         | 56.5% (70/123)                                         |         |
| Opioid number ≥4                                       | 48.1% (128/266)                                                          | 40.6% (58/143)                            |         | 46.9% (116/247)                                                         | 42.8% (53/123)                                         |         |
| <b>Cardiac Disorders</b>                               |                                                                          |                                           |         |                                                                         |                                                        |         |
| Aortic Aneurysm                                        | 0.4% (1/266)                                                             | 3.5% (5/143)                              | .021    | 0.3% (1/247)                                                            | 1.4% (2/123)                                           | 1       |
| Aortic Valve Disease                                   | 0.4% (1/266)                                                             | 0% (0/148)                                | 1       | 0% (0/247)                                                              | 0% (0/123)                                             | ---     |
| Chronic Heart Failure                                  | 0.4% (1/266)                                                             | 2.1% (3/142)                              | .124    | 0.6% (2/247)                                                            | 1.1% (1/123)                                           | 1       |
| Coronary Artery Disease                                | 2.3% (6/266)                                                             | 8.5% (12/141)                             | .004    | 5.1% (13/247)                                                           | 5.1% (6/123)                                           | .997    |
| Hypertension                                           | 48.9% (130/266)                                                          | 53.8% (77/143)                            | .337    | 50.7% (125/247)                                                         | 51.3% (63/123)                                         | .908    |
| Mitral Valve Disease                                   | 1.5% (4/266)                                                             | 0.7% (1/143)                              | .662    | 1.2% (3/247)                                                            | 0.4% (1/123)                                           | 1       |
| Myocardial Infarction                                  | 0.8% (2/266)                                                             | 3.5% (5/142)                              | .052    | 2.2% (5/247)                                                            | 2.1% (3/123)                                           | 1       |
| Orthostatic Hypotension                                | 0% (0/272)                                                               | 0% (0/148)                                | ---     | 0% (0/247)                                                              | 0% (0/123)                                             | ---     |
| Pulmonary Hypertension                                 | 0.8% (2/266)                                                             | 0% (0/148)                                | .544    | 0% (0/247)                                                              | 0% (0/123)                                             | ---     |
| <b>Sarcoidosis</b>                                     | 0.4% (1/266)                                                             | 0% (0/148)                                | 1       | 0% (0/247)                                                              | 0% (0/123)                                             | ---     |
| <b>Sepsis</b>                                          | 0.8% (2/266)                                                             | 0.7% (1/143)                              | 1       | 0.4% (1/247)                                                            | 0.4% (1/123)                                           | 1       |
| <b>Diabetes - Type I</b>                               | 1.5% (4/266)                                                             | 3.5% (5/143)                              | .287    | 2.2% (6/247)                                                            | 2% (2/123)                                             | 1       |
| <b>Diabetes - Type II</b>                              | 13.9% (37/266)                                                           | 17.5% (25/143)                            | .337    | 15.7% (39/247)                                                          | 18.7% (23/123)                                         | .470    |
| <b>Muscular Dystrophy</b>                              | 0.4% (1/266)                                                             | 0.7% (1/143)                              | 1       | 0.4% (1/247)                                                            | 0.4% (1/123)                                           | 1       |
| <b>Kidney Failure</b>                                  | 1.1% (3/266)                                                             | 1.4% (2/143)                              | 1       | 1% (2/247)                                                              | 0.8% (1/123)                                           | 1       |
| <b>Respiratory, Thoracic and Mediastinal Disorders</b> |                                                                          |                                           |         |                                                                         |                                                        |         |
| Acute Bronchitis                                       | 2.6% (7/266)                                                             | 1.4% (2/143)                              | .504    | 2.3% (6/247)                                                            | 2.5% (3/123)                                           | 1       |
| Asthma                                                 | 16.2% (43/266)                                                           | 11.2% (16/143)                            | .187    | 13.4% (33/247)                                                          | 14.8% (18/123)                                         | .707    |
| Chronic Bronchitis                                     | 0.8% (2/266)                                                             | 0% (0/148)                                | .544    | 0.5% (1/247)                                                            | 0% (0/123)                                             | 1       |
| Chronic Obstructive Pulmonary                          | 4.5% (12/266)                                                            | 6.3% (9/143)                              | .436    | 5.5% (14/247)                                                           | 4.5% (6/123)                                           | .679    |
| Chronic Restrictive Lung Disease                       | 0% (0/272)                                                               | 0.7% (1/143)                              | .350    | 0% (0/247)                                                              | 0% (0/123)                                             | ---     |
| Pneumonia                                              | 0.8% (2/266)                                                             | 1.4% (2/143)                              | .614    | 0.8% (2/247)                                                            | 0.9% (1/123)                                           | 1       |
| Pulmonary Fibrosis                                     | 0.4% (1/266)                                                             | 0% (0/148)                                | 1       | 0% (0/247)                                                              | 0% (0/123)                                             | ---     |
| <b>Sleep Disorders</b>                                 | 14.5% (38/262)                                                           | 15.8% (22/139)                            | .724    | 14.5% (36/247)                                                          | 13.4% (16/123)                                         | .776    |
| <b>Vascular Disorders</b>                              |                                                                          |                                           |         |                                                                         |                                                        |         |
| Cerebral Aneurysm                                      | 0.8% (2/266)                                                             | 2.1% (3/143)                              | .348    | 1.3% (3/247)                                                            | 1.1% (1/123)                                           | 1       |
| Peripheral Vascular Disease                            | 1.9% (5/266)                                                             | 2.1% (3/143)                              | 1       | 1.6% (4/247)                                                            | 1.4% (2/123)                                           | 1       |
| Stroke                                                 | 1.1% (3/266)                                                             | 2.8% (4/142)                              | .244    | 1.6% (4/247)                                                            | 1.6% (2/123)                                           | 1       |

| Clinical Characteristic                    | Patient Characteristics before Propensity Weighting (excluding outliers) |                                           |              | Patient Characteristics after Propensity Weighting (excluding outliers) |                                                        |         |
|--------------------------------------------|--------------------------------------------------------------------------|-------------------------------------------|--------------|-------------------------------------------------------------------------|--------------------------------------------------------|---------|
|                                            | No Respiratory Depression Episode (n=266)                                | ≥1 Respiratory Depression Episode (n=143) | p-value      | No Respiratory Depression Episode (n=247) <sup>a</sup>                  | ≥1 Respiratory Depression Episode (n=123) <sup>a</sup> | p-value |
| Transient Ischemic Attack                  | 0.8% (2/266)                                                             | 1.4% (2/142)                              | .613         | 0.9% (2/247)                                                            | 1% (1/123)                                             | 1       |
| <b>STOP BANG Score</b>                     |                                                                          |                                           |              |                                                                         |                                                        |         |
| Low Risk (0-2)                             | 48.5% (126/260)                                                          | 37% (51/138)                              | .0374        | 43% (106/247)                                                           | 40.6% (50/123)                                         | .904    |
| Intermediate Risk (3-4)                    | 33.5% (87/260)                                                           | 35.5% (49/138)                            |              | 36.6% (90/247)                                                          | 37.6% (46/123)                                         |         |
| High Risk (5-8)                            | 18.1% (47/260)                                                           | 27.5% (38/138)                            |              | 20.4% (50/247)                                                          | 21.8% (27/123)                                         |         |
| <b>Procedure</b>                           |                                                                          |                                           | .154         |                                                                         |                                                        | .985    |
| Bone and joint                             | 21.8% (58/266)                                                           | 18.2% (26/143)                            |              | 20.8% (51/247)                                                          | 18.8% (23/123)                                         |         |
| Gastrointestinal                           | 24.8% (66/266)                                                           | 16.8% (24/143)                            |              | 22.5% (56/247)                                                          | 19.1% (24/123)                                         |         |
| Hepatobiliary                              | 2.3% (6/266)                                                             | 7.7% (11/143)                             |              | 3% (7/247)                                                              | 4.3% (5/123)                                           |         |
| Medical                                    | 5.6% (15/266)                                                            | 3.5% (5/143)                              |              | 2% (5/247)                                                              | 3.1% (4/123)                                           |         |
| Nervous system, skull and spine            | 35.7% (95/266)                                                           | 43.4% (62/143)                            |              | 41.2% (102/247)                                                         | 43.1% (53/123)                                         |         |
| Obstetric and gynecological                | 5.6% (15/266)                                                            | 6.3% (9/143)                              |              | 6.8% (17/247)                                                           | 6.4% (8/123)                                           |         |
| Other                                      | 1.1% (3/266)                                                             | 2.8% (4/143)                              |              | 1.1% (3/247)                                                            | 1.5% (2/123)                                           |         |
| Renal and urinary tract                    | 0.4% (1/266)                                                             | 0% (0/143)                                |              | 0.3% (1/247)                                                            | 0% (0/123)                                             |         |
| Respiratory tract                          | 0.4% (1/266)                                                             | 0% (0/143)                                |              | 0.3% (1/247)                                                            | 0% (0/123)                                             |         |
| Therapeutic procedures and supportive care | 2.3% (6/266)                                                             | 1.4% (2/143)                              | 2.2% (5/247) | 3.7% (5/123)                                                            |                                                        |         |

<sup>a</sup>Patients missing any demographic or clinical data used excluded from propensity weighting

Abbreviations: ASA = American Society of Anesthesiologists; BMI = body mass index; CNS = central nervous system; SD= standard deviation; STOP BANG = Snoring, Tiredness, Observed apnea, blood Pressure, Body mass index, Age, Neck circumference and Gender
