# Supplementary material for: Opioid-induced respiratory depression increases hospital costs and length of stay in patients recovering on the general care floor
Source: PubMed Central journal article supplement (PMC7980593; doi:10.1186/s12871-021-01307-8), 2021-03-20
Supplement: 12871_2021_1307_MOESM4_ESM.pdf [file 12871_2021_1307_MOESM4_ESM.pdf]

**S4 Table. Surgical procedures performed on enrolled patients in the United States.**

| <b>Procedure Type</b>                      | <b>Percent of Procedures</b> |
|--------------------------------------------|------------------------------|
| Bone and joint                             | 20.71%                       |
| Gastrointestinal                           | 21.43%                       |
| Hepatobiliary                              | 4.05%                        |
| Medical                                    | 5.24%                        |
| Nervous system, skull and spine            | 38.57%                       |
| Obstetric and gynecological                | 5.95%                        |
| Renal and urinary tract                    | 0.24%                        |
| Respiratory tract                          | 0.24%                        |
| Therapeutic procedures and supportive care | 1.9%                         |
| Other                                      | 1.67%                        |
