# Supplementary material for: Opioid-induced respiratory depression increases hospital costs and length of stay in patients recovering on the general care floor
Source: PubMed Central journal article supplement (PMC7980593; doi:10.1186/s12871-021-01307-8), 2021-03-20
Supplement: 12871_2021_1307_MOESM5_ESM.pdf [file 12871_2021_1307_MOESM5_ESM.pdf]

**S5 Table. Generalized linear model of healthcare costs in all enrolled United States patients, including patient outliers.**

| Clinical Characteristic                       | Exponentiated estimates | 95% CI               | p value |
|-----------------------------------------------|-------------------------|----------------------|---------|
| <b>Intercept</b>                              | 8,002.43                | 3,589.61 – 17,840.03 | <.0001  |
| <b>Length of stay</b>                         | 1.06                    | 1.05 – 1.07          | <.0001  |
| <b>Respiratory depression</b>                 | 0.92                    | 0.80 – 1.06          | .271    |
| <b>Length of stay* Respiratory depression</b> | 1.04                    | 1.01 – 1.06          | .002    |
| <b>Open Surgery (vs laparoscopic)</b>         | 0.92                    | 0.79 – 1.08          | .309    |
| <b>Length of surgery (hr)</b>                 |                         |                      | <.0001  |
| 0                                             | 0.75                    | 0.53 – 1.05          |         |
| ≥2 - <4 vs. <2                                | 1.28                    | 1.17 – 1.41          |         |
| >4 vs. <2                                     | 1.71                    | 1.51 – 1.93          |         |
| <b>BMI</b>                                    |                         |                      | .002    |
| <20                                           | 0.82                    | 0.63 - 1.06          |         |
| ≥20 - <25                                     | ---                     | ---                  | ---     |
| ≥25 - <30                                     | 0.94                    | 0.83 - 1.05          |         |
| ≥30 - <35                                     | 1                       | 0.88 - 1.13          |         |
| ≥35                                           | 1.19                    | 1.03 - 1.38          |         |
| <b>Procedure</b>                              |                         |                      | <.0001  |
| Bone and joint                                | 1.42                    | 1.06 – 1.92          |         |
| Gastrointestinal                              | 1.03                    | 0.77 – 1.38          |         |
| Hepatobiliary                                 | 1.31                    | 0.91 – 1.89          |         |
| Nervous system, skull and spine               | 1.81                    | 1.35 – 2.41          |         |
| Obstetric and gynecological                   | 1.10                    | 0.80 – 1.51          |         |
| Renal and urinary tract                       | 2.07                    | 0.93 – 4.58          |         |
| Respiratory tract                             | 1.10                    | 0.48 – 2.52          |         |
| Other                                         | 1.56                    | 0.95 – 2.57          |         |
| Therapeutic procedures and supportive care    | ---                     | ---                  | ---     |
| Medical <sup>a</sup>                          | 0.61                    | 0.42 – 0.88          | .008    |

<sup>a</sup>Effect of medical procedure was estimated in a separate model due to the multicollinearity between length of surgery and medical patients.

Abbreviations: 95% CI = 95% confidence interval; BMI = body mass index
