# Supplementary material for: Opioid-induced respiratory depression increases hospital costs and length of stay in patients recovering on the general care floor
Source: PubMed Central journal article supplement (PMC7980593; doi:10.1186/s12871-021-01307-8), 2021-03-20
Supplement: 12871_2021_1307_MOESM6_ESM.pdf [file 12871_2021_1307_MOESM6_ESM.pdf]

**S6 Table. Multivariable regression model of hospital length of stay for all enrolled patients in the United States, including patient outliers.**

| Clinical Characteristic                                   | Estimate | Standard Error | Wald 95% Confidence Limits | Wald Chi-Square | Pr > Chi Square |
|-----------------------------------------------------------|----------|----------------|----------------------------|-----------------|-----------------|
| <b>Male</b>                                               | 0.1759   | 0.0621         | 0.0542 - 0.2977            | 8.03            | .005            |
| <b>BMI</b>                                                |          |                |                            |                 |                 |
| $\geq 20$ - <25                                           | -0.2536  | 0.1613         | -0.5698 - 0.0626           | 2.47            | .116            |
| $\geq 25$ - <30                                           | -0.0974  | 0.1565         | -0.4042 - 0.2094           | 0.39            | .534            |
| $\geq 30$ - <35                                           | -0.1261  | 0.1636         | -0.4467 - 0.1944           | 0.59            | .441            |
| $\geq 35$                                                 | -0.2105  | 0.1605         | -0.5251 - 0.1041           | 1.72            | .190            |
| <b>Opioid Naive</b>                                       | -0.2907  | 0.0681         | -0.4242 - -0.1572          | 18.21           | <.0001          |
| <b>Number of Opioids</b>                                  |          |                |                            |                 |                 |
| >1 - <4                                                   | -0.5788  | 0.0884         | -0.7522 - -0.4055          | 42.85           | <.0001          |
| $\geq 4$                                                  | -0.8847  | 0.1043         | -1.0892 - -0.6802          | 71.93           | <.0001          |
| <b>Length of surgery (hr)</b>                             |          |                |                            |                 |                 |
| $\geq 2$ - <4                                             | -0.1368  | 0.0703         | -0.2746 - 0.0009           | 3.79            | .052            |
| $\geq 4$                                                  | 0.1668   | 0.0740         | 0.0217 - 0.3119            | 5.08            | .024            |
| <b>Current smoker</b>                                     | 0.2363   | 0.0782         | 0.0830 - 0.3895            | 9.13            | .003            |
| <b>Sleep disorders</b>                                    | -0.1042  | 0.0856         | -0.2719 - 0.0635           | 1.48            | .223            |
| <b><math>\geq 1</math> Respiratory Depression Episode</b> | 0.1779   | 0.0607         | 0.0590 - 0.2968            | 8.60            | .003            |
| <b>Aortic valve disease</b>                               | -0.3277  | 0.2373         | -0.7927 - 0.1373           | 1.91            | .167            |
| <b>Hypertension</b>                                       | -0.0808  | 0.0611         | -0.2005 - 0.0389           | 1.75            | .186            |
| <b>Myocardial infarction</b>                              | 0.2484   | 0.1541         | -0.0537 - 0.5505           | 2.60            | .107            |
| <b>Acute bronchitis</b>                                   | 0.3494   | 0.1833         | -0.0099 - 0.7087           | 3.63            | .057            |
| <b>Asthma</b>                                             | -0.0937  | 0.0909         | -0.2719 - 0.0845           | 1.06            | .303            |
| <b>Peripheral Vascular Disease</b>                        | 0.3927   | 0.1532         | 0.0923 - 0.6930            | 6.57            | .010            |
| <b>Transient ischemic attack</b>                          | -0.3266  | 0.2335         | -0.7843 - 0.1310           | 1.96            | .162            |
| <b>Kidney Failure</b>                                     | 0.1708   | 0.1311         | -0.0861 - 0.4278           | 1.70            | .193            |
| <b>Sepsis</b>                                             | 1.2003   | 0.1263         | 0.9527 - 1.4479            | 90.27           | <.0001          |

Abbreviation: BMI = body mass index
